# Supplementary material for: Synaptic pathology and therapeutic repair in adult retinoschisis mouse by AAV-RS1 transfer
Source: JCI journal article supplement (doi:10.1172/jci81380), 2015-06-21
Supplement: sd1 [file 1]

## SUPPLEMENTARY MATERIAL

Synaptic pathology, plasticity and therapeutic repair in the retina of adult *Rs1*-KO mouse by *RS1* gene transfer

J. Ou<sup>1\*</sup>, C. Vijayasarathy<sup>2\*</sup>, L. Ziccardi<sup>2†</sup>, S. Chen<sup>1</sup>, Y. Zeng<sup>2</sup>, D. Marangoni<sup>2</sup>, J. G. Pope<sup>1¶</sup>, R. A. Bush<sup>2</sup>, Z. Wu<sup>3</sup>, W. Li<sup>1</sup>, P.A. Sieving<sup>2,4‡</sup>

## SUPPLEMENTARY MATERIALS

Supplemental Table 1. Buffers used in Calcium Imaging

Supplemental Table 2. Antibodies used in immunohistochemistry and Western Blots

Supplemental Figure 1. Synaptic protein expression profile in WT and *Rs1*-KO mice retinas at P22.

Supplemental Table. 1. Buffers used in Calcium Imaging

| Components (in mM)                        | 3mM Ca <sup>2+</sup> | 0 mM Ca <sup>2+</sup> | 20 mM Ca <sup>2+</sup> |
|-------------------------------------------|----------------------|-----------------------|------------------------|
| NaCl                                      | 100                  | 95                    | 70                     |
| CaCl <sub>2</sub>                         | 3                    | 2                     | 20                     |
| KCl                                       | 5                    | 5                     | 5                      |
| MgCl <sub>2</sub>                         | 3                    | 3                     | 3                      |
| Glucose                                   | 10                   | 10                    | 10                     |
| NaCHO <sub>3</sub>                        | 25                   | 25                    | 10                     |
| All buffers have the osmolarity of 285±5. |                      |                       |                        |

Supplemental Table 2. List of Antibodies used in Immunohistochemical Detection and Western Blot Analysis: Antibody Type, host species, source and dilutions used in this study.

| Antibody name   | Species    | Source                                                       | Dilution |
|-----------------|------------|--------------------------------------------------------------|----------|
| RS1             | Guinea Pig | Custom-made                                                  | 1:1000   |
| Gao             | Mouse      | Millipore, MAB3073                                           | 1:1000   |
| TRPM1           | Rabbit     | Takahisha Furukawa, Osaka Bioscience Institute, Osaka, Japan | 1:300    |
| CtBP2/RIBEYE    | Mouse      | BD Biosciences, 612044                                       | 1:500    |
| CaV1.4          | Sheep      | Catherine W. Morgans, OHSU, Portland, OR                     | 1:300    |
| Protein bassoon | Rabbit     | Covance, Custom-made                                         | 1:1000   |
| GPR179          | Mouse      | Yomics, AB0887-YOM                                           | 1:200    |
| mGluR6          | Sheep      | Catherine W. Morgans, OHSU, Portland, OR                     | 1:300    |
| PKC             | Mouse      | Sigma, P5704                                                 | 1:2000   |
| VGluT1          | Guinea Pig | Millipore, AB5905                                            | 1:1000   |
| Gβ5             | Goat       | Theodore G. Wensel, BCM, Houston TX                          | 1:1000   |
| RGS7            | Rabbit     | Theodore G. Wensel                                           | 1:1000   |
| RGS11           | Rabbit     | Theodore G. Wensel                                           | 1:1000   |

Supplemental Figure 1. Synaptic protein expression profile in WT and *Rs1*-KO mice retinas at P22.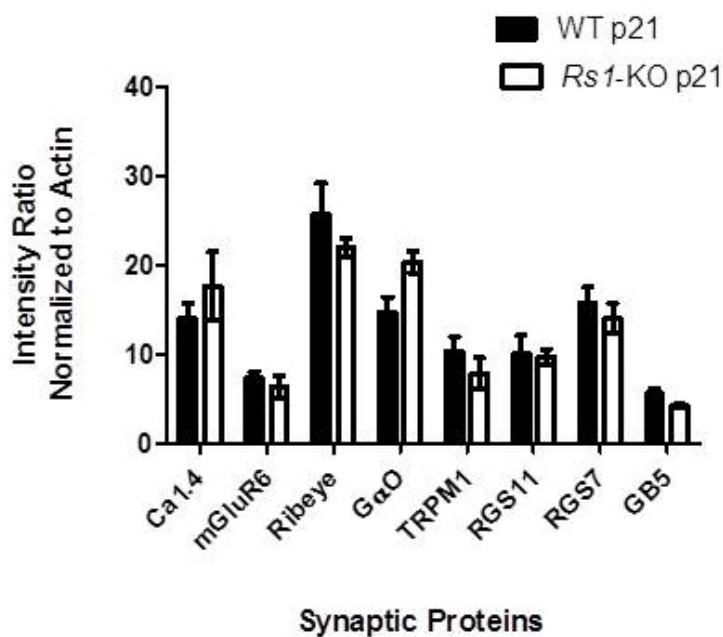

Quantitative results of Western blot analyses of synaptic protein expression levels in WT and *Rs1*-KO mice at P22. Intensities of immunoreactive bands on Western blots were quantified for protein expression with Odyssey Imaging Software (Li-Cor Biosciences) and normalized to  $\beta$ -actin signal intensity. There were no significant differences in the quantities of synaptic proteins between the wild-type and the *Rs1*-KO mice. Values represent Mean  $\pm$ SEM from three different experimental samples and each is a pool of 2 retinas from two different mice.
